# Supplementary material
Source: PubMed Central journal article supplement (PMC4418448)
Supplement: NIHMS684611-supplement-S_Fig_1.pdf [file NIHMS684611-supplement-S_Fig_1.pdf]

A)

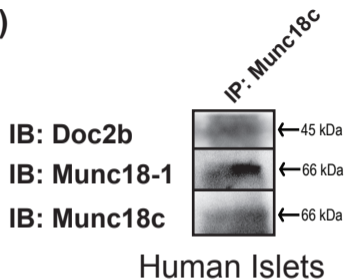

B)

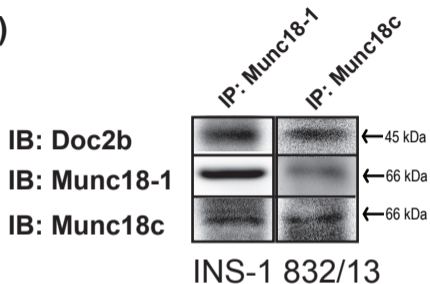**Supplemental Fig. 1: Interaction between Munc18-1, Doc2b and Munc18c in human islets and INS-1 beta cells.**

Cleared detergent lysates prepared from human islets were used in co-immunoprecipitation (IP) reactions with anti-Munc18c antibody (A), and INS-1 derived 832/13 cell lysates were used in co-immunoprecipitation reactions with anti-Munc18-1 or anti-Munc18c antibodies (B). Coprecipitated proteins were resolved by 10% SDS-PAGE for immunoblotting (IB). Data are representative of two independent sets of INS-1 lysates and one batch of human islets.
